# Supplementary material for: Varying solvent polarity to tune the enantioselective quenching of a calixarene host
Source: Royal Society of Chemistry journal article supplement (doi:10.1039/b404553j), 2004-10-13
Supplement: b404553j.pdf [file b404553j.pdf]

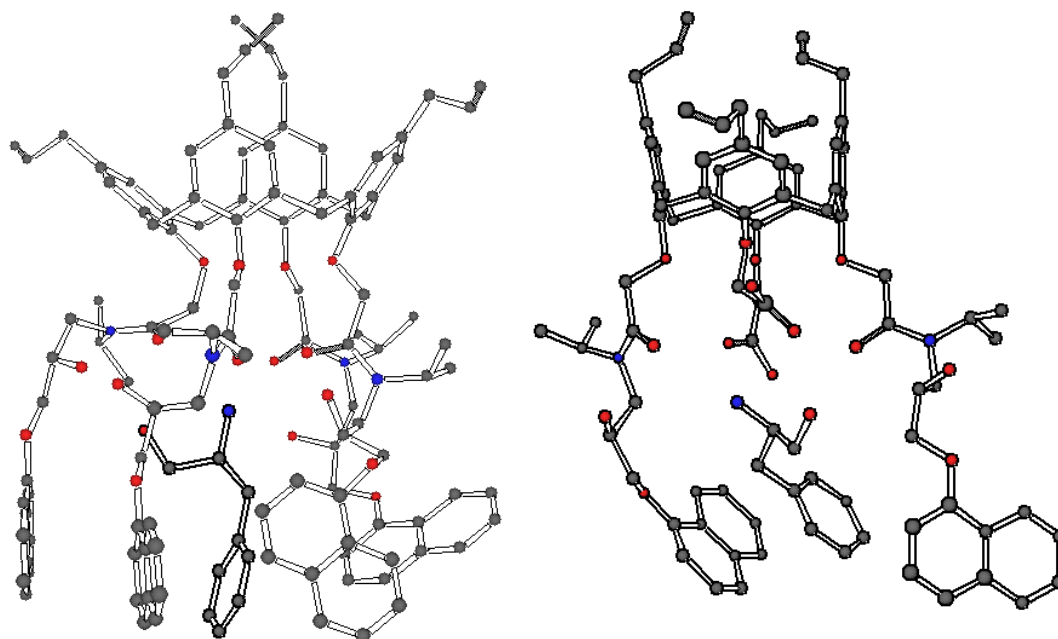

Figure 9: *Side-on view of L1 and PA (left of picture) and L2 and PA (right of picture), showing how the guest may be included in the calixarene cavity, and also the extent of steric crowding involved. The modelling calculations were carried out using Spartan [i] SGI Version 5.1.1. The models shown correspond to the conformer found with the lowest energy*

---

<sup>i</sup> Spartan, Wavefunction Inc., 18401 Von Karman Ave., Suite 370, Irvine, CA 92612, U.S.A.  
<http://www.wavefun.com/>.
